# Supplementary material for: Fiction, Falsehoods, and Few Facts: Cross-Sectional Study on the Content-Related Quality of Atopic Eczema-Related Videos on YouTube
Source: PubMed Central journal article supplement (PMC7210495; doi:10.2196/15599), 2020-04-24
Supplement: jmir_v22i4e15599_app2.pdf [file jmir_v22i4e15599_app2.pdf]

## Multimedia Appendix 2.

DISCERN instrument for evaluating health information of online videos (adapted from Charnock [31]).

| <b>Questions</b>                                                                    | <b>Points</b> |
|-------------------------------------------------------------------------------------|---------------|
| 1. Are the aims clear?                                                              | 1-5           |
| 2. Does the video clip achieve its aims?                                            | 1-5           |
| 3. Is it relevant?                                                                  | 1-5           |
| 4. Is it clear what sources of information were used to compile the video?          | 1-5           |
| 5. Is it clear when the information used or reported in the video was produced?     | 1-5           |
| 6. Is the content balanced and unbiased?                                            | 1-5           |
| 7. Does the video provide details of additional sources of support and information? | 1-5           |
| 8. Does it refer to areas of uncertainty?                                           | 1-5           |
| 9. Does it describe how each treatment works?                                       | 1-5           |
| 10. Does it describe the benefits of each treatment?                                | 1-5           |
| 11. Does it describe the risks of each treatment?                                   | 1-5           |
| 12. Does it describe what would happen if no treatment was used?                    | 1-5           |
| 13. Does it describe how the treatment choices affect overall quality of life?      | 1-5           |
| 14. Is it clear that there may be more than one possible treatment choice?          | 1-5           |
| 15. Does it provide support for shared decision making?                             | 1-5           |
| 16. Overall rating of the video based on the answers to all of the above questions  | 1-5           |
