# Supplementary material for: Fiction, Falsehoods, and Few Facts: Cross-Sectional Study on the Content-Related Quality of Atopic Eczema-Related Videos on YouTube
Source: PubMed Central journal article supplement (PMC7210495; doi:10.2196/15599), 2020-04-24
Supplement: jmir_v22i4e15599_app3.pdf [file jmir_v22i4e15599_app3.pdf]

### **Multimedia Appendix 3.**

Global Quality Score (GQS) used for evaluation of video clips (adapted from Singh [30]).

| <b>Item characteristics</b>                                                                                                                              | <b>Points</b> |
|----------------------------------------------------------------------------------------------------------------------------------------------------------|---------------|
| Poor quality; poor flow of the video; most information missing; not at all useful for patients                                                           | 1             |
| Generally poor quality and poor flow; some information listed, but many important topics missing; of very limited use for patients                       | 2             |
| Moderate quality; suboptimal flow; some important information adequately discussed, but other information poorly discussed; somewhat useful for patients | 3             |
| Good quality and generally good flow; most of the relevant information listed, but some topics not covered; useful for patients                          | 4             |
| Excellent quality and flow; very useful for patients                                                                                                     | 5             |
