# Supplementary material for: Fiction, Falsehoods, and Few Facts: Cross-Sectional Study on the Content-Related Quality of Atopic Eczema-Related Videos on YouTube
Source: PubMed Central journal article supplement (PMC7210495; doi:10.2196/15599), 2020-04-24

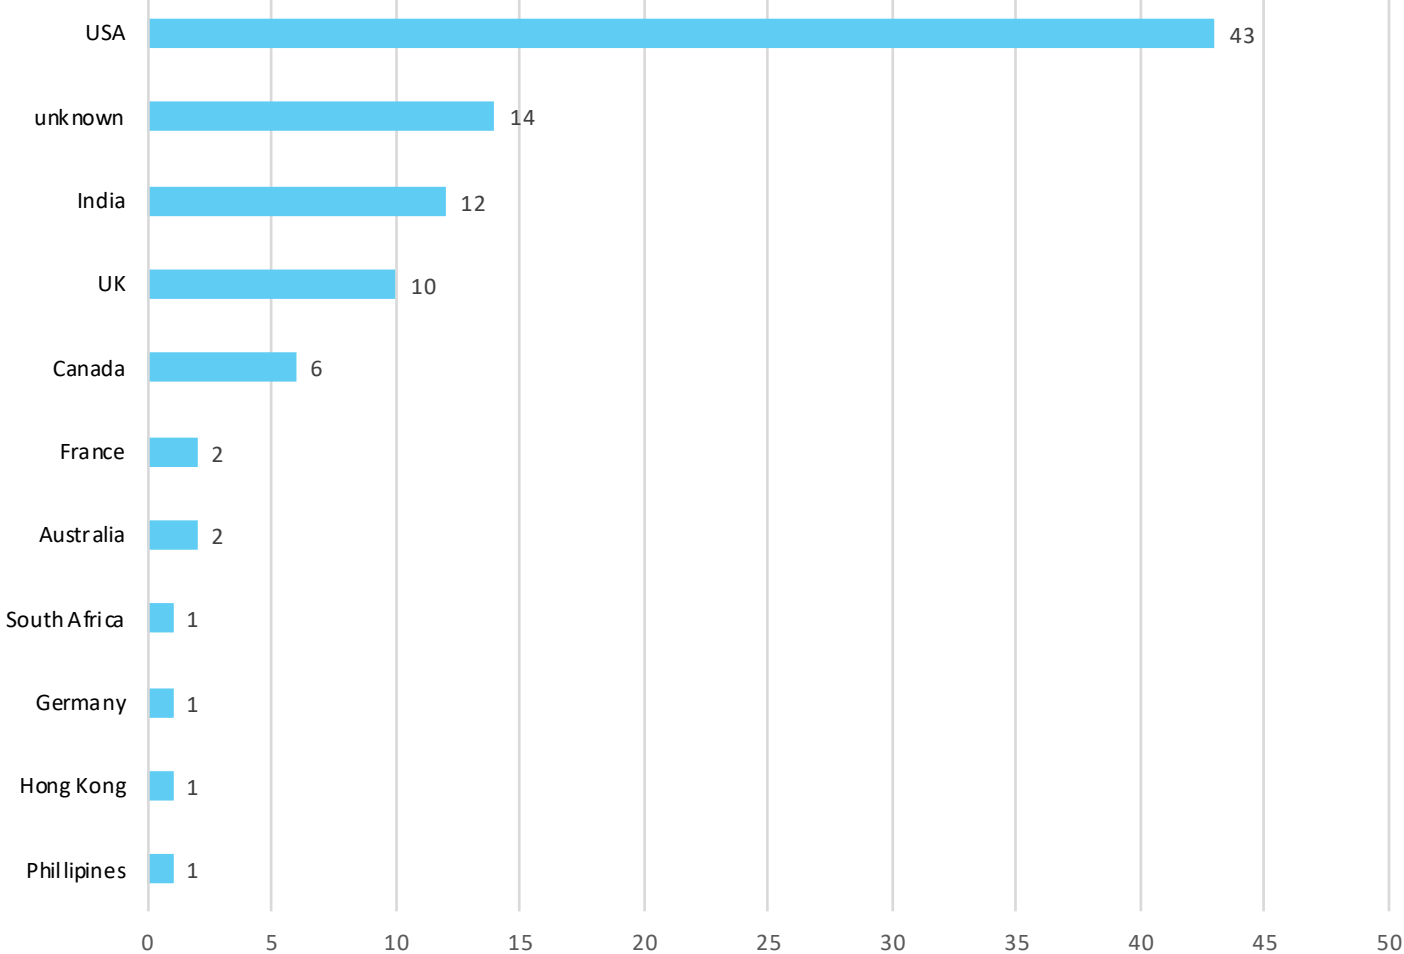

Supplement: jmir_v22i4e15599_app4.pdf [file jmir_v22i4e15599_app4.pdf]
